# Supplementary material
Source: PubMed Central journal article supplement (PMC2174708)
Supplement: plntcell_tpc.107.052480_1.pdf [file plntcell_tpc.107.052480_1.pdf]

Supplemental figures. Hayama et al., 2007.  
 A circadian rhythm set by dusk determines  
 the expression of *FT* homologues and the  
 short day photoperiodic flowering response  
 in *Pharbitis*

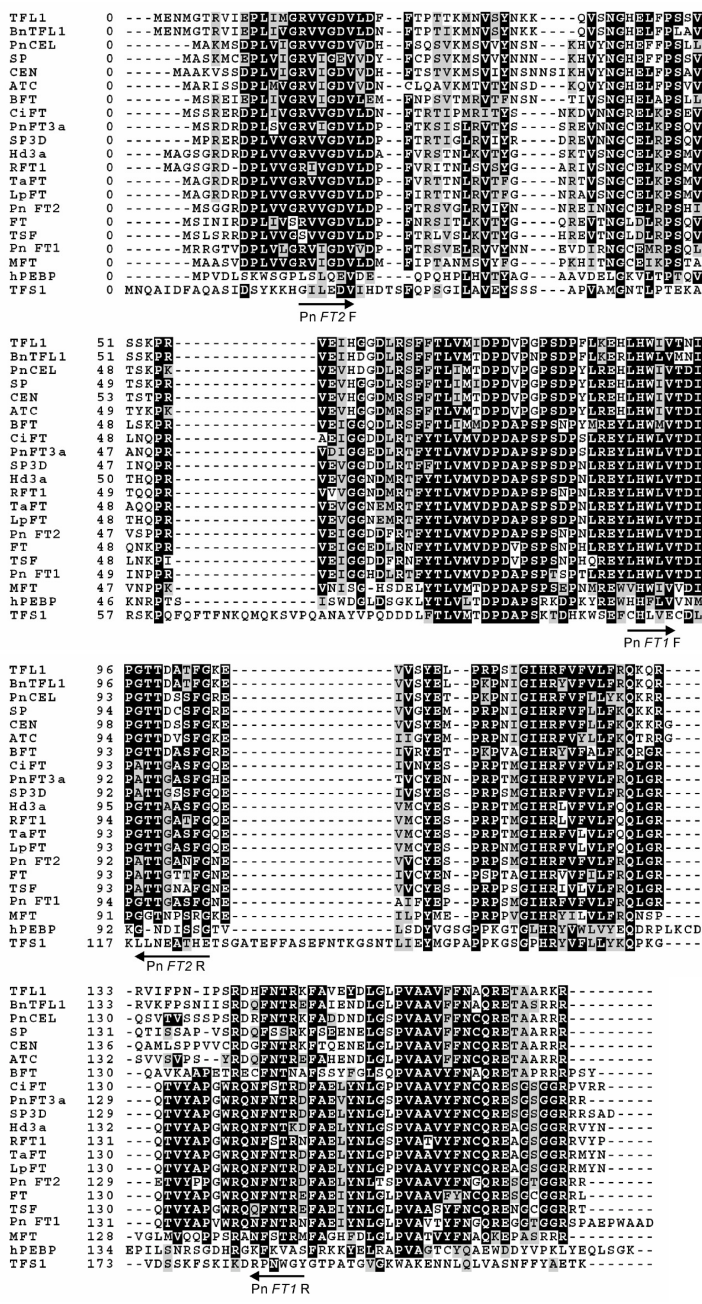

**Supplemental Figure 1. Alignment of sequences of FT-like proteins.**  
 Multiple sequence alignment of the protein sequences used to assemble Figure 1A.  
 Positions of the primers used to isolate *Pn FT1* and *Pn FT2* are indicated.

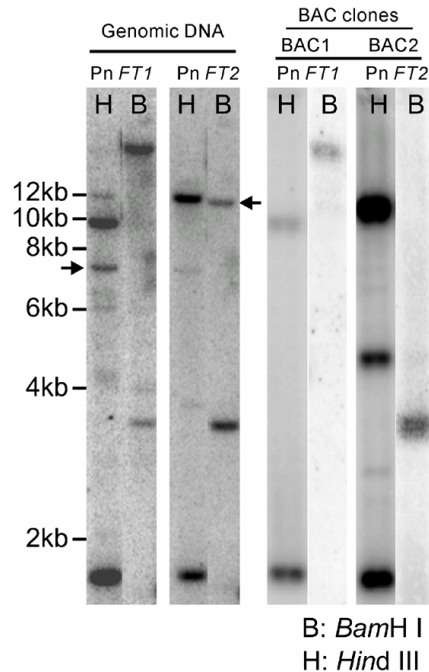

**Supplemental Figure 2. Pharbitis genomic DNA and BAC clones of Pharbitis DNA containing Pn *FT1* or Pn *FT2* hybridized with Pn *FT1* or Pn *FT2* probes.**

Pharbitis genomic DNA (two left hand panels), a BAC clone containing Pn *FT1* (BAC1) and a BAC clone containing Pn *FT2* (BAC2) were cleaved with *BamH* I (B) or *Hind* III (H). The probes used for hybridization were fragments containing full-length open reading frames of Pn *FT1* or Pn *FT2*, and the probes used in each case are shown above each panel. *BamH* I and *Hind* III fragments characteristic for each gene, as defined by the BAC analysis, are detected in genomic DNA by using Pn *FT1* or Pn *FT2* as a probe. However, additional fragments are detected in the genomic hybridizations that cannot be explained by Pn *FT1* or Pn *FT2*. For example, in the *Hind* III digestion probed with Pn *FT1* 1 (arrow) and in the *BamH* I digestion probed with Pn *FT2* (arrow) one additional fragment that cannot be explained by Pn *FT1* or Pn *FT2* is detected in each case. This analysis indicates that there are likely to be at least two additional *FT*-like genes in Pharbitis.

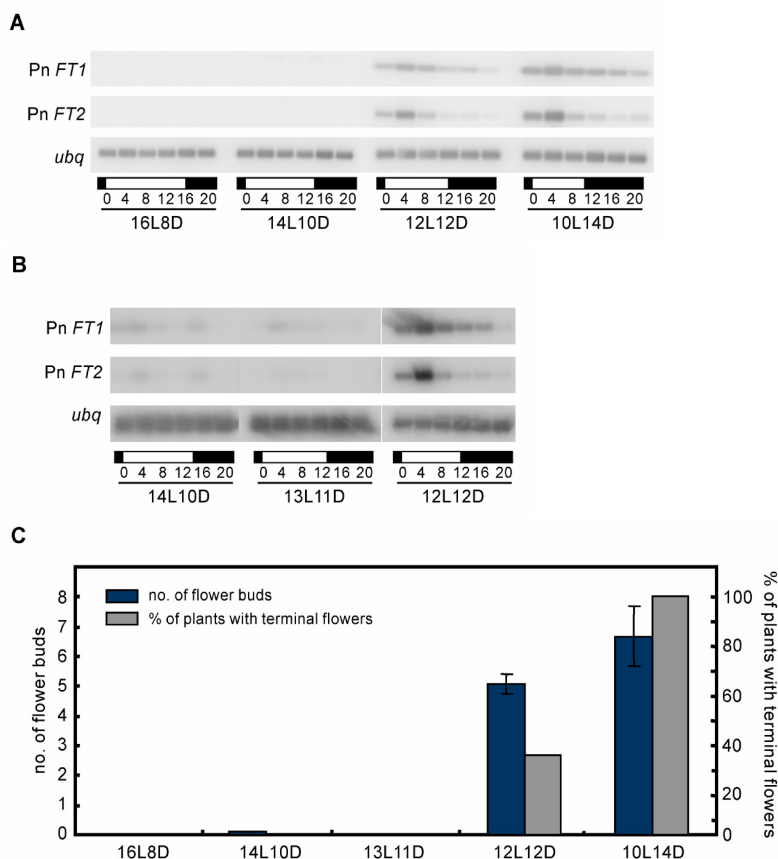

**Supplemental Figure 3. Effects of different light/dark regimes on Pn *FT1* and Pn *FT2* expression and on flowering.**

**A.** Pn *FT1* and Pn *FT2* expression under 4 different light/dark regimes. Both genes are expressed under 12L:12D and 10L:14D but not under 16L:8D or 14L:10D. This experiment indicates that a night length between 10 h and 12 h is required to induce expression of Pn *FT1* or Pn *FT2*. RNA was extracted from the cotyledons of plants grown under LDs of 16hL:8hD and then shifted to the conditions shown for three days before harvesting.

**B.** Pn *FT1* and Pn *FT2* expression under 3 different light/dark regimes. Both genes are expressed under 12L:12D but not under 14L:10D or 13L:11D. This experiment extends the conclusion drawn from panel A, and indicates that a night length between 11 h and 12 h is required to induce expression of Pn *FT1* or Pn *FT2*. RNA was extracted from the cotyledons of plants grown under LDs of 14hL:10hD for 3 days and then shifted to the conditions shown for 4 days before harvesting.

**C.** Analysis of flowering of plants grown under the 5 different regimes used in panels A and B then shifted to continuous light. Flowering was scored 28 days after transfer to continuous light. Only plants grown under 12L:12D or 10L:14D produce flower buds and terminal flowers. Therefore a precise correlation is observed between those conditions in which Pn *FT1*/Pn *FT2* expression occurs and flowering is observed.

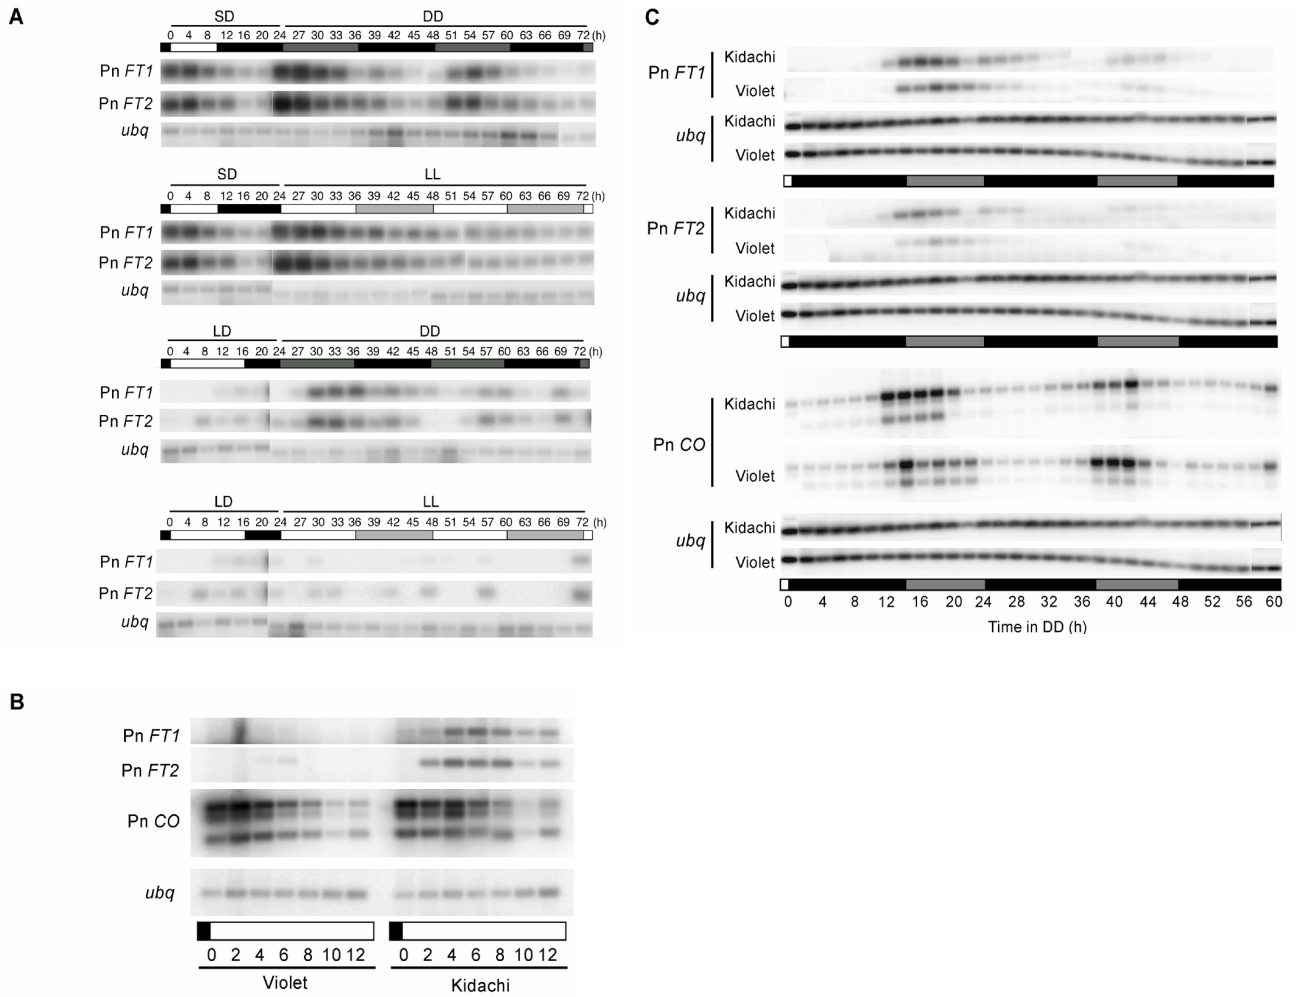

**Supplemental Figure 4. Gel blot data used for quantifications shown in Figures.**

**A.** Gel blot data used for Figure 3.

**B.** Gel blot data used for Figures 5A and B.

**C.** Gel blot data used for Figure 5 D, E and F.
